# Supplementary material for: Effects of protein-rich multi-nutrient intervention on bone mineralization and development: insights from a randomized controlled trial in prepubertal children and a zebrafish experiment
Source: Royal Society of Chemistry journal article supplement (doi:10.1039/d4fo04240a), 2025-01-01
Supplement: d4fo04240a1.pdf [file d4fo04240a1.pdf]

## Supplementary Materials

Supplementary Table 1. Nutrient composition of the protein-fortified compound nutritional drink (per 235 ml).

Supplementary Table 2. The toxicology results of MPC, CP, and WPH.

Supplementary Table 3. The results of different models for benchmark dose of MPC and WPH.

Supplementary Table 4. Major baseline characteristics of children after propensity score weighting.

Supplementary Table 5. Urinalysis results of children in the RCT at baseline and week 10 of the trial.

Supplementary Table 6. The mean number of vertebrae, fluorescence intensity, and relative effect at different doses of MPC, CP, and WPH, respectively.

Supplementary Table 7. Changes in BMD and BMC in the treatment and control groups with adjustment for serum calcium concentration.

Supplementary Figure 1. The best-fitting model curve for benchmark dose of MPC and WPH, respectively.

Supplementary Figure 2. Serum 25(OH)VD, 25(OH)D<sub>2</sub>, and bone turnover biomarkers (N-MID, P1NP, and  $\beta$ -CTx) of children in the RCT.

**Supplementary Table 1.** Nutrient Composition of the protein-fortified compound nutritional drink (per 235 ml).

| <b>Nutrients</b>                                        | <b>Content</b> | <b>Unit</b>     |
|---------------------------------------------------------|----------------|-----------------|
| Protein                                                 | 15.0           | g               |
| Milk protein concentrates and whey protein hydrolysates | 13.0           | g               |
| Collagen peptide                                        | 2.0            | g               |
| Fat                                                     | 5.32           | g               |
| Carbohydrate                                            | 31.24          | g               |
| Dietary fiber                                           | 3.6            | g               |
| Vitamin A                                               | 120            | µg              |
| Vitamin C                                               | 15             | mg              |
| Vitamin D                                               | 3              | µg              |
| Vitamin E                                               | 2.7            | mg $\alpha$ -TE |
| Vitamin B1                                              | 0.52           | mg              |
| Vitamin B2                                              | 0.52           | mg              |
| Vitamin B6                                              | 0.5            | mg              |
| Vitamin B12                                             | 0.4            | µg              |
| Biotin                                                  | 11             | µg              |
| Niacin                                                  | 5.5            | mg              |
| pantothenic acid                                        | 1.2            | mg              |
| Taurine                                                 | 13.6           | mg              |
| Calcium                                                 | 300            | mg              |
| Phosphorus                                              | 188            | mg              |
| Zinc                                                    | 3.5            | mg              |
| Selenium                                                | 13             | µg              |

**Supplementary Table 2.** The toxicology results of MPC, CP, and WPH

| Dose ( $\mu\text{g/mL}$ ) | MPC     |           | CP      |        | WPH     |          |
|---------------------------|---------|-----------|---------|--------|---------|----------|
|                           | Exposed | Deaths    | Exposed | Deaths | Exposed | Deaths   |
|                           | number  | (%)       | number  | (%)    | number  | (%)      |
| 0                         | 30      | 0         | 30      | 0      | 30      | 0        |
| 125                       | 30      | 0         | 30      | 0      | 30      | 0        |
| 250                       | 30      | 0         | 30      | 0      | 30      | 0        |
| 300                       | 30      | 0         | /       | /      | /       | /        |
| 350                       | 30      | 0*        | /       | /      | /       | /        |
| 400                       | 30      | 4(13.3%)  | /       | /      | /       | /        |
| 450                       | 30      | 4(13.3%)  | /       | /      | /       | /        |
| 500                       | 30      | 8(26.7%)  | 30      | 0      | 30      | 12(40%)  |
| 1000                      | 30      | 14(46.7%) | 30      | 0*     | 30      | 15(50%)  |
| 2000                      | 30      | 30(100%)  | 30      | 0      | 30      | 30(100%) |

\*The status of zebrafish was poor.

**Supplementary Table 3.** The results of different models for benchmark dose of MPC and WPH

| Reagents | Model                 | Benchmark<br>Dose Lower<br>Bound* | Benchmark<br>Dose | Benchmark<br>Dose Upper<br>Bound* | P-Value      | AIC            | Scaled Residual for<br>Dose Group near<br>Benchmark Dose | Scaled Residual<br>for Control Dose<br>Group |
|----------|-----------------------|-----------------------------------|-------------------|-----------------------------------|--------------|----------------|----------------------------------------------------------|----------------------------------------------|
| MPC      | Hill                  | 380.518                           | 438.591           | 498.804                           | 0.1          | 144.473        | 0.449                                                    | -0.001                                       |
|          | Gamma                 | 379.903                           | 438.544           | 496.692                           | 0.174        | 141.66         | 0.452                                                    | -0.001                                       |
|          | LogLogistic           | 380.518                           | 438.591           | 498.804                           | 0.1          | 144.473        | 0.449                                                    | -0.001                                       |
|          | Multistage 1°         | 163.033                           | 201.33            | 252.198                           | <0.001       | 185.988        | -2.048                                                   | -0.001                                       |
|          | Multistage 2°         | 335.508                           | 378.481           | 429.234                           | 0.364        | 141.79         | 0.389                                                    | -0.001                                       |
|          | Multistage 3°         | 370.611                           | 443.164           | 516.621                           | 0.316        | 137.927        | 0.536                                                    | -0.001                                       |
|          | Multistage 4°         | 366.231                           | 442.972           | 517.212                           | 0.317        | 137.927        | 0.534                                                    | -0.001                                       |
|          | Multistage 5°         | 362.813                           | 437.976           | 517.281                           | 0.349        | 137.819        | 0.487                                                    | -0.001                                       |
|          | Multistage 6°         | 360.73                            | 435.48            | 516.386                           | 0.369        | 137.672        | 0.464                                                    | -0.001                                       |
|          | Multistage 7°         | 359.478                           | 434.288           | 515.564                           | 0.38         | 137.56         | 0.453                                                    | -0.001                                       |
|          | <b>Multistage 8°#</b> | <b>358.764</b>                    | <b>433.747</b>    | <b>514.98</b>                     | <b>0.387</b> | <b>137.486</b> | <b>0.447</b>                                             | <b>-0.001</b>                                |
|          | Weibull               | 375.253                           | 443.343           | 513.148                           | 0.245        | 139.634        | 0.533                                                    | -0.001                                       |
|          | Logistic              | 431.49                            | 500.407           | 574.776                           | 0.036        | 147.205        | 2.72                                                     | -0.608                                       |
|          | LogProbit             | 382.548                           | 433.393           | 484.314                           | 0.164        | 141.983        | 0.343                                                    | -0.001                                       |

|     |                        |                |                |                |              |               |               |               |
|-----|------------------------|----------------|----------------|----------------|--------------|---------------|---------------|---------------|
|     | Probit                 | 410.01         | 474.971        | 543.865        | 0.073        | 144.567       | 0.745         | -0.422        |
|     | Quantal Linear         | 163.038        | 201.33         | 252.189        | <0.001       | 185.988       | -2.048        | -0.001        |
|     | Hill                   | 263.899        | 348.377        | 434.936        | 0.013        | 101.092       | -1.147        | -0.001        |
|     | Gamma                  | 258.574        | 348.029        | 435.865        | 0.024        | 98.681        | -1.167        | -0.001        |
|     | LogLogistic            | 263.899        | 348.377        | 434.936        | 0.013        | 101.092       | -1.147        | -0.001        |
|     | Multistage 1°          | 97.577         | 122.493        | 155.847        | 0.003        | 116.205       | -1.845        | -0.001        |
|     | Multistage 2°          | 244.761        | 326.041        | 375.507        | 0.095        | 94.763        | -1.385        | -0.001        |
|     | Multistage 3°          | 235.1          | 337.705        | 431.478        | 0.08         | 94.666        | -1.329        | -0.001        |
| WPH | Multistage 4°          | 220.759        | 340.844        | 427.52         | 0.079        | 94.465        | -1.32         | -0.001        |
|     | <b>Multistage 5° #</b> | <b>213.457</b> | <b>342.214</b> | <b>422.923</b> | <b>0.082</b> | <b>94.177</b> | <b>-1.316</b> | <b>-0.001</b> |
|     | Weibull                | 247.055        | 339.75         | 436.705        | 0.045        | 96.69         | -1.31         | -0.001        |
|     | Logistic               | 332.08         | 414            | 506.114        | 0.001        | 105.43        | 3.458         | -0.859        |
|     | LogProbit              | 273.473        | 353.133        | 432.808        | 0.025        | 98.875        | -0.983        | -0.001        |
|     | Probit                 | 314.514        | 392.833        | 480.847        | 0.003        | 102.782       | 3.304         | -0.67         |
|     | Quantal Linear         | 97.578         | 122.493        | 155.844        | 0.003        | 116.205       | -1.845        | -0.001        |

\* Lower and upper bound of the 95% confidence interval for benchmark dose; # Recommended best-fitting model; AIC: Akaike Information Criterion.

**Supplementary Table 4.** Major baseline characteristics of children after propensity score weighting.

| <b>Variable</b>                    | <b>Control<br/>(N=60)</b> | <b>Treatment<br/>(N=60)</b> | <b>P value</b> |
|------------------------------------|---------------------------|-----------------------------|----------------|
| Age, years                         | 10.46(0.12)               | 10.37(0.09)                 | 0.552          |
| Weight, kg                         | 31.49(0.75)               | 31.93(1.17)                 | 0.754          |
| Height, cm                         | 139.05(0.81)              | 138.84(1.14)                | 0.884          |
| Body mass index, kg/m <sup>2</sup> | 16.17(0.26)               | 16.36(0.35)                 | 0.676          |

Data are shown as Mean (Standard Error).

**Supplementary Table 5.** Urinalysis results of children in the RCT at baseline and week 10 of the trial\*.

| Urinalysis Variables | Group                     | Baseline    |             |           | Week 10     |             |           |
|----------------------|---------------------------|-------------|-------------|-----------|-------------|-------------|-----------|
|                      |                           | Control     | Treatment   | P value # | Control     | Treatment   | P value # |
| LEU                  | Negative (-)              | 47 (83.93)  | 50 (89.29)  | 0.664     | 40 (88.89)  | 40 (93.02)  | NA        |
|                      | Borderline Positive (+/-) | 2 (3.57)    | 1 (1.79)    |           | 2 (4.44)    | 1 (2.33)    |           |
|                      | Positive (+)              | 7 (12.50)   | 5 (8.93)    |           | 3 (6.67)    | 2 (4.65)    |           |
|                      | Sum                       | 56 (100.00) | 56 (100.00) |           | 45 (100.00) | 43 (100.00) |           |
| ERY                  | Negative (-)              | 48 (85.71)  | 51 (91.07)  | 0.684     | 42 (93.33)  | 41 (95.35)  | NA        |
|                      | Borderline Positive (+/-) | 4 (7.14)    | 3 (5.36)    |           | 2 (4.44)    | 1 (2.33)    |           |
|                      | Positive (+)              | 4 (7.14)    | 2 (3.57)    |           | 1 (2.22)    | 1 (2.33)    |           |
|                      | Sum                       | 56 (100.00) | 56 (100.00) |           | 45 (100.00) | 43 (100.00) |           |
| PRO                  | Negative (-)              | 47 (83.93)  | 47 (83.93)  | 0.692     | 36 (80.00)  | 39 (90.70)  | 0.263     |
|                      | Borderline Positive (+/-) | 6 (10.71)   | 4 (7.14)    |           | 4 (8.89)    | 3 (6.98)    |           |
|                      | Positive (+)              | 3 (5.36)    | 5 (8.93)    |           | 5 (11.11)   | 1 (2.33)    |           |
|                      | Sum                       | 56 (100.00) | 56 (100.00) |           | 45 (100.00) | 43 (100.00) |           |
| BIL                  | Negative (-)              | 56 (100.00) | 56 (100.00) | NA        | 45 (100.00) | 43 (100.00) | NA        |
|                      | Sum                       | 56 (100.00) | 56 (100.00) |           | 45 (100.00) | 43 (100.00) |           |

|       |                           |               |               |       |               |               |       |
|-------|---------------------------|---------------|---------------|-------|---------------|---------------|-------|
|       | Negative (-)              | 40 (71.43)    | 41 (73.21)    |       | 31 (68.89)    | 35 (81.40)    |       |
| USCME | Positive (+)              | 16 (28.57)    | 15 (26.79)    | NA    | 14 (31.11)    | 8 (18.60)     | 0.221 |
|       | Sum                       | 56 (100.00)   | 56 (100.00)   |       | 45 (100.00)   | 43 (100.00)   |       |
|       | Negative (-)              | 54 (96.43)    | 56 (100.00)   |       | 45 (100.00)   | 43 (100.00)   |       |
| NIT   | Positive (+)              | 2 (3.57)      | 0 (0.00)      | 0.495 | 0             | 0             | NA    |
|       | Sum                       | 56 (100.00)   | 56 (100.00)   |       | 45 (100.00)   | 43 (100.00)   |       |
|       | Negative (-)              | 56 (100.00)   | 56 (100.00)   |       | 42 (93.33)    | 43 (100.00)   |       |
| KET   | Borderline Positive (+/-) | 0             | 0             | NA    | 2 (4.44)      | 0             | NA    |
|       | Positive (+)              | 0             | 0             |       | 1 (2.22)      | 0             |       |
|       | Sum                       | 56 (100.00)   | 56 (100.00)   |       | 45 (100.00)   | 43 (100.00)   |       |
|       | Negative (-)              | 52 (92.86)    | 51 (91.07)    |       | 36 (80.00)    | 39 (90.70)    |       |
| UBG   | Borderline Positive (+/-) | 3 (5.36)      | 3 (5.36)      | NA    | 8 (17.78)     | 3 (6.98)      | 0.314 |
|       | Positive (+)              | 1 (1.79)      | 2 (3.57)      |       | 1 (2.22)      | 1 (2.33)      |       |
|       | Sum                       | 56 (100.00)   | 56 (100.00)   |       | 45 (100.00)   | 43 (100.00)   |       |
|       | Negative (-)              | 56 (100.00)   | 56 (100.00)   | NA    | 45 (100.00)   | 43 (100.00)   | NA    |
| GLU   | Sum                       | 56 (100.00)   | 56 (100.00)   |       | 45 (100.00)   | 43 (100.00)   |       |
| SG    | /                         | 1.020 (0.001) | 1.020 (0.001) | 0.606 | 1.021 (0.001) | 1.022 (0.001) | 0.148 |



|    |   |               |               |       |               |               |       |
|----|---|---------------|---------------|-------|---------------|---------------|-------|
| PH | / | 6.547 (0.088) | 6.584 (0.089) | 0.771 | 6.591 (0.097) | 6.366 (0.101) | 0.112 |
|----|---|---------------|---------------|-------|---------------|---------------|-------|

Data are shown as frequency (percentage) for categorical variables or Mean (standard error) for continuous variables.

\*For urinalysis, 112 urine samples at baseline and 88 urine samples at week were obtained.

#P values were obtained using Fisher's Exact Test for categorical variables or linear mixed effect model for continuous variables

Abbreviations: LEU, leukocytes; ERY, erythrocytes; PRO, protein; BIL, bilirubin; USCME, urine sediment centrifugation microscopy examination; NIT, nitrite;

KET, ketone bodies; UBG, urobilinogen; GLU, glucose; SG, specific gravity; PH, pondus hydrogenii.

**Supplementary Table 6.** The mean number of vertebrae, fluorescence intensity, and relative effect at different doses of MPC, CP, and WPH, respectively.

| <b>Group</b>     | <b>Mean Number of Vertebrae</b> | <b>Fluorescence Intensity</b> | <b>Relative Effect (%)</b> |
|------------------|---------------------------------|-------------------------------|----------------------------|
| Blank control    | 1                               | 18224.27 ± 1815.21            | 0 ± 20.31                  |
| Positive control | 2.5                             | 27162.41 ± 2953.24            | 100±33.04                  |
| MPC 30.5 µg/mL   | 1.6                             | 20528.40 ± 4027.55            | 25.78 ± 45.06              |
| MPC 61.0 µg/mL   | 1.7                             | 21997.97 ± 1907.68            | 42.22 ± 21.34              |
| MPC 122 µg/mL    | 1.7                             | 24094.65 ± 2189.39            | 65.68 ± 24.49              |
| CP 70.0 µg/mL    | 1.6                             | 18787.54 ± 2409.1             | 6.3 ± 26.95                |
| CP 140 µg/mL     | 2.4                             | 23911.26 ± 2432.68            | 63.63 ± 27.22              |
| CP 210 µg/mL     | 2.5                             | 27116.06 ± 3465.14            | 99.48 ± 38.77              |
| WPH 50.0 µg/mL   | 1.2                             | 18876.35 ± 2074.51            | 7.3 ± 23.21                |
| WPH 100 µg/mL    | 2.3                             | 21314.26 ± 2332.89            | 34.57 ± 26.1               |
| WPH 200 µg/mL    | 2.2                             | 26899.43 ± 3439.26            | 97.06 ± 38.48              |

**Supplementary Table 7.** Changes in BMD and BMC in the treatment and control groups with adjustment for serum calcium concentration.

| Variables                | Control group<br>(95% CI) | Treatment group<br>(95% CI) | Difference between<br>groups<br>(95% CI) | <i>P</i> for<br>difference |
|--------------------------|---------------------------|-----------------------------|------------------------------------------|----------------------------|
| BMD (g/cm <sup>2</sup> ) | -0.051 (-0.067, -0.035)   | -0.025 (-0.043, -0.007)     | 0.026 (0.003, 0.050)                     | 0.030                      |
| BMC (g)*                 | -0.049 (-0.067, -0.031)   | -0.025 (-0.044, -0.005)     | 0.025 (-0.001, 0.050)                    | 0.057                      |

\*For analysis of BMC, bone area was also adjusted.

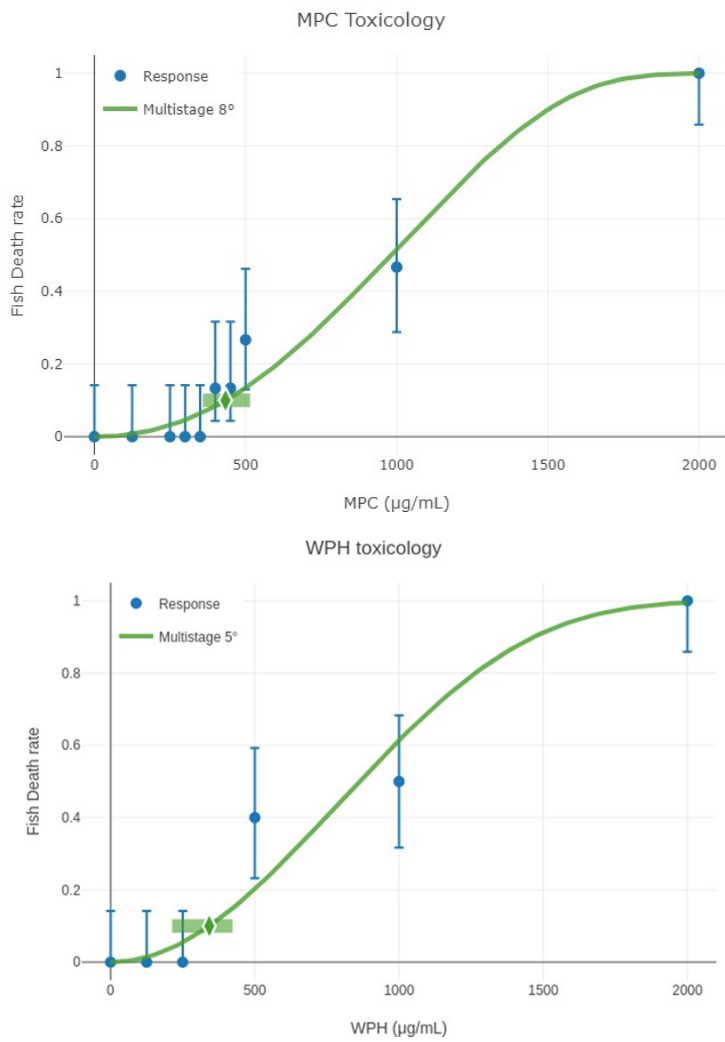

**Supplementary Figure 1.** The best-fitting model curve for bench mark dose of MPC and WPH, respectively.

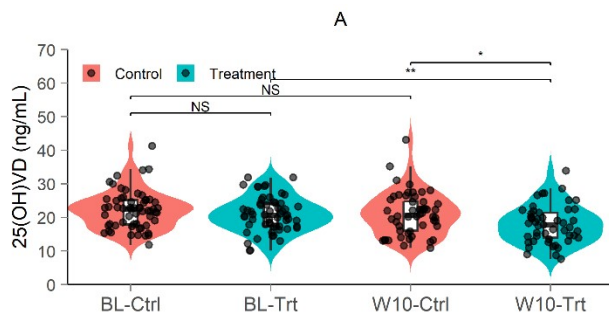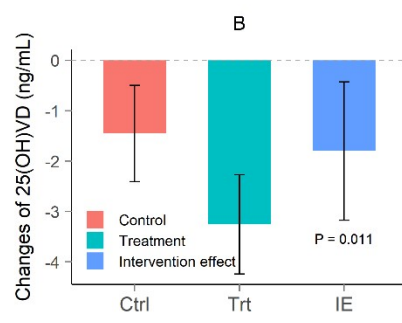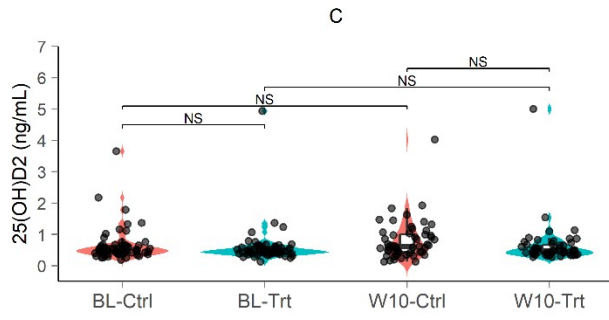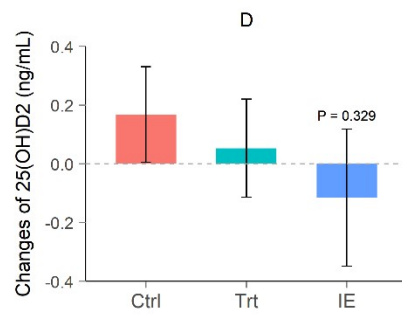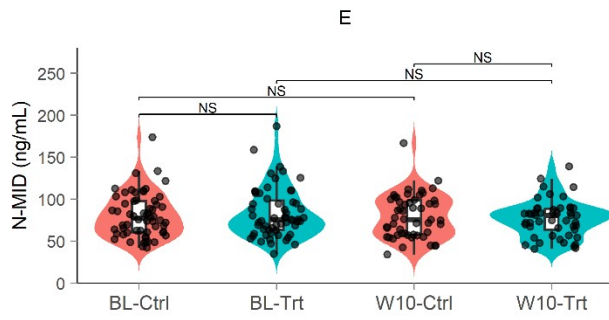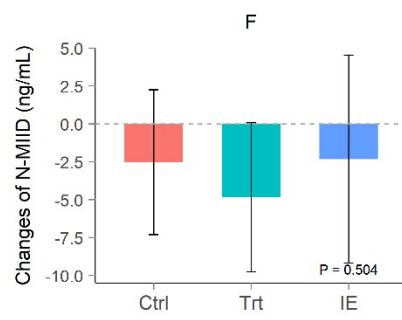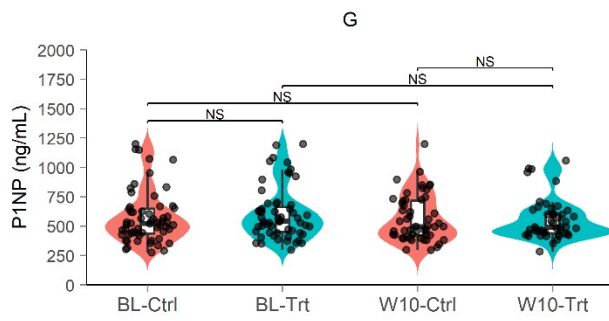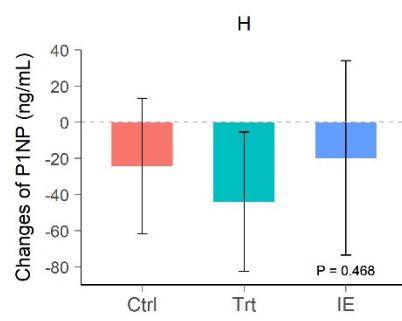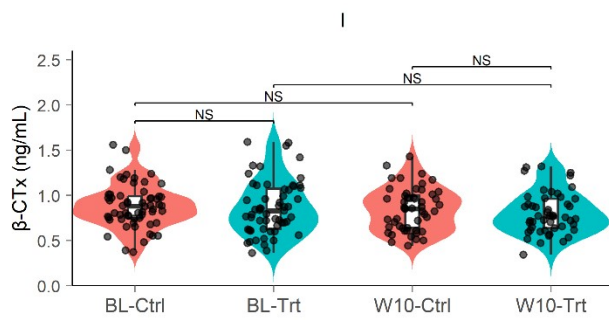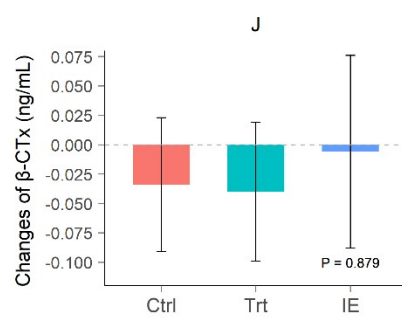

**Supplementary Figure 2.** Serum 25(OH)VD, 25(OH)D2, and bone turnover biomarkers (N-MID, P1NP, and  $\beta$ -CTX) of children in the RCT. Panel A, C, E, G, and I: Violin plots for biomarkers of children in control and treatment group measured at baseline and week-10 of the trial; the difference between two groups was compared by the Wilcoxon test. Panel B, D, F, H, and J: Bar plots for the changes of bone biomarkers during intervention and the intervention effect analyzed by the mixed effect model. \* P < 0.05; \*\* P < 0.01; \*\*\* P < 0.001; NS, not significant; error bars show 95% confidence intervals
